# Supplementary material
Source: PubMed Central journal article supplement (PMC8920072)
Supplement: NIHMS1694352-supplement-4.pdf [file NIHMS1694352-supplement-4.pdf]

# Supplementary Data File

## Metreleptin therapy for nonalcoholic steatohepatitis: Open-label therapy interventions in two different clinical settings

BARIS AKINCI<sup>1,2</sup>, ANGELA SUBAUSTE<sup>1,3</sup>, NEVIN AJLUNI<sup>1</sup>, NAZANENE H. ESFANDIARI<sup>1</sup>, RASIMCAN MERAL<sup>1</sup>, ADAM H. NEIDERT<sup>1</sup>, AKIN ERASLAN<sup>1</sup>, RITA HENCH<sup>1</sup>, DIANA RUS<sup>1</sup>, BARBARA MCKENNA<sup>4</sup>, HERO K. HUSSAIN<sup>5</sup>, THOMAS L. CHENEVERT<sup>5</sup>, MARWAN K. TAYEH<sup>6</sup>, AMIT R. RUPANI<sup>6</sup>, JEFFREY W. INNIS<sup>6,7</sup>, CHRISTOS S. MANTZOROS<sup>8</sup>, HARI S. CONJEEVARAM<sup>9</sup>, CHARLES L. BURANT<sup>1</sup>, ELIF A. ORAL<sup>1,10</sup>

<sup>1</sup>Division of Metabolism, Endocrinology and Diabetes, Department of Internal Medicine, University of Michigan, Ann Arbor, MI, USA;

<sup>2</sup>Division of Endocrinology and Metabolism, Department of Internal Medicine, Dokuz Eylul University, Izmir, Turkey; <sup>3</sup>Division of Endocrinology and Diabetes, Department of Medicine, University of Mississippi Medical Center, Jackson, MS, USA; <sup>4</sup>Department of Pathology, University of Michigan, Ann Arbor, MI, USA; <sup>5</sup>Department of Radiology, University of Michigan, Ann Arbor, MI, USA;

<sup>6</sup>Departments of Pediatrics, University of Michigan, Ann Arbor, MI, USA; <sup>7</sup>Departments of Human Genetics, University of Michigan, Ann Arbor, MI, USA, <sup>8</sup>Endocrinology, Diabetes and Metabolism, Beth Israel Deaconess Medical Center, Harvard Medical School, Boston, MA, USA; <sup>9</sup>Division of Gastroenterology, Department of Internal Medicine, University of Michigan, Ann Arbor, MI, USA.;

<sup>10</sup>Lead contact.

**Additional supplementary data for the partial lipodystrophy (PL) study**

**Supplementary Data 1. Characteristics of the PL study cohort.**

| Subject ID | Age | Sex | LD type | Genetic variant         | Baseline leptin level (ng/ml) | Morphometrics - Baseline |             |             |                    | Morphometrics – 12 months |             |             |                    |
|------------|-----|-----|---------|-------------------------|-------------------------------|--------------------------|-------------|-------------|--------------------|---------------------------|-------------|-------------|--------------------|
|            |     |     |         |                         |                               | %fat trunk/% fat legs    | weight (kg) | BMI (kg/m2) | waist-to-hip ratio | %fat trunk/% fat legs     | weight (kg) | BMI (kg/m2) | waist-to-hip ratio |
| 1          | 39  | F   | FPLD    | † <i>FBN1</i> p.M1576T  | 16.9                          | 1.47                     | 90.6        | 31.2        | 1.00               | 1.6                       | 89.7        | 30.9        | 1.01               |
| 2          | 55  | M   | FPLD    | None identified         | 13.4                          | 1.28                     | 98.6        | 28.2        | 0.93               | 1.9                       | 94.8        | 27.1        | 0.91               |
| 3          | 53  | F   | FPLD    | None identified         | 34.1                          | 1.5                      | 91.3        | 35.9        | 1.07               | 1.61                      | 95.3        | 37.5        | 1.12               |
| 4          | 24  | M   | APL     | None identified         | 4.8                           | 0.83                     | 76.9        | 24.1        | 0.82               | N/A                       | N/A         | N/A         | N/A                |
| 5          | 64  | M   | FPLD    | None identified         | 24.4                          | 1.6                      | 121.9       | 35.2        | 1.05               | 1.5                       | 119.7       | 34.5        | 1.01               |
| 6          | 34  | F   | FPLD    | ‡ <i>POLD1</i> p.E1067K | 9.0                           | 1.95                     | 53.0        | 18.1        | 0.96               | 1.7                       | 50.8        | 17.4        | 0.95               |
| 7          | 14  | F   | FPLD    | ‡ <i>POLD1</i> p.E1067K | 11.5                          | 1.4                      | 50.4        | 19.0        | 1.02               | 1.2                       | 49.2        | 18.3        | 0.95               |
| 8          | 58  | F   | FPLD    | None identified         | 26.5                          | 1.63                     | 84.1        | 31.0        | 1.12               | 1.7                       | 85.8        | 31.6        | 1.08               |
| 9          | 54  | F   | FPLD    | None identified         | 10.5                          | 1.35                     | 54.5        | 24.1        | 0.96               | 1.2                       | 47.9        | 21.2        | 0.96               |
| 10         | 33  | F   | FPLD    | <i>LMNA</i> p.R60G      | 16.6                          | 2.22                     | 54.2        | 19.8        | 0.90               | 1.9                       | 52.3        | 19.1        | 0.89               |
| 11         | 34  | M   | FPLD    | None identified         | 19.1                          | 1.62                     | 113.8       | 34.0        | 1.16               | 1.6                       | 120.8       | 36.1        | 1.16               |
| 12         | 63  | F   | FPLD    | † <i>DYRK1B</i> p.S462R | 48.9                          | 1.6                      | 69.9        | 30.9        | 1.04               | 1.5                       | 67.4        | 29.8        | 1.02               |
| 13         | 57  | F   | FPLD    | <i>LMNA</i> p.R482Q     | 16.2                          | 2.31                     | 74.3        | 24.9        | 0.93               | 2.0                       | 68.6        | 23.0        | 0.91               |
| 14         | 36  | M   | FPLD    | † <i>SREBF1</i> p.R913I | 16.1                          | 1.42                     | 109.9       | 31.5        | 0.96               | N/A                       | N/A         | N/A         | N/A                |
| 15         | 12  | F   | FPLD    | None identified         | 7.2                           | 1.99                     | 42.3        | 17.7        | 1.00               | 2.2                       | 47.2        | 18.8        | 0.97               |
| 16         | 57  | F   | FPLD    | None identified         | 35.2                          | 1.43                     | 82.7        | 30.3        | 1.07               | 1.3                       | 78.7        | 28.8        | 0.97               |
| 17         | 42  | F   | FPLD    | <i>LMNA</i> p.R482Q     | 6.4                           | 1.49                     | 67.9        | 24.0        | 0.85               | 1.5                       | 63.3        | 22.4        | 0.84               |
| 18         | 49  | F   | FPLD    | <i>LMNA</i> p.R482Q     | 13.6                          | 1.94                     | 62.6        | 25.3        | 0.93               | N/A                       | N/A         | N/A         | N/A                |
| 19         | 55  | F   | FPLD    | None identified         | 67.1                          | 1.6                      | 90.0        | 38.3        | 1.03               | N/A                       | N/A         | N/A         | N/A                |
| 20         | 59  | F   | FPLD    | <i>LMNA</i> p.R482Q     | 11.8                          | 2.03                     | 61.2        | 21.9        | 0.99               | 1.8                       | 61.8        | 22.2        | 0.92               |
| 21         | 41  | F   | FPLD    | <i>LMNA</i> p.R482W     | 12.8                          | 1.53                     | 71.3        | 25.9        | 0.92               | 1.5                       | 73.0        | 26.5        | 0.98               |
| 22         | 37  | F   | FPLD    | <i>LMNA</i> p.R349W     | 55.4                          | 3.63                     | 63.3        | 26.4        | 1.07               | 4.4                       | 61.7        | 25.8        | 1.10               |
| 23         | 13  | F   | FPLD    | None identified         | 35.6                          | 1.37                     | 90.9        | 30.5        | 0.99               | 1.3                       | 96.4        | 31.8        | 0.96               |

APL: acquired partial lipodystrophy, BMI: body mass index, *DYRK1B*: dual-specificity tyrosine phosphorylation-regulated kinase 1b, *FBN-1*: fibrillin-1, FPLD: familial partial lipodystrophy, LD: lipodystrophy, *LMNA*: lamin A/C, *POLD1*: polymerase (DNA-directed), delta 1, catalytic subunit-1; *SREBF1*: sterol regulatory element-binding transcription factor 1.

†Variant of uncertain significance. ‡ These two related patients had the p.E1067K variant of the *POLD1* gene, which is located at exon 26 of the *POLD1* gene within the CysB region. This *POLD1* variant was previously reported as VUS that is likely pathogenic<sup>1</sup>. Although this variant had not been observed before in any public database, the amino acid change was at a conserved position of the protein in sequenced mammals. This variant has recently been observed in 1 individual from South Asia at a very low allele frequency of 0.0000004368 in the gnomAD database (<https://gnomad.broadinstitute.org/variant/19-50920508-A-C>). The glutamic acid at position 1067 is at a conserved position of the protein in sequenced mammals. Later, Elouej et al.<sup>2</sup> reported mandibular hypoplasia, deafness, progeroid features, and lipodystrophy syndrome (MDPL) patients with *POLD1* p.I1070N variant. Similar to our patient, MDPL was caused by a variant within the CysB region of the *POLD1* gene, a highly-conserved motif across eukaryotic DNA polymerases. Given the rarity of the variant and the occurrence of the second case of MDPL with a variant within the same region of the *POLD1* gene, we now consider the p.E1067K variant to be associated with the reported phenotype.

#### References

1. Ajluni, N., Meral, R., Neidert, A.H., Brady, G.F., Buras, E., McKenna, B., DiPaola, F., Chenevert, T.L., Horowitz, J.F., Buggs-Saxton, C., et al. (2017). Spectrum of disease associated with partial lipodystrophy: lessons from a trial cohort. *Clin Endocrinol (Oxf)* 86, 698-707. 10.1111/cen.13311.
2. Elouej, S., Beleza-Meireles, A., Caswell, R., Colclough, K., Ellard, S., Desvignes, J.P., Beroud, C., Levy, N., Mohammed, S., and De Sandre-Giovannoli, A. (2017). Exome sequencing reveals a de novo *POLD1* mutation causing phenotypic variability in mandibular hypoplasia, deafness, progeroid features, and lipodystrophy syndrome (MDPL). *Metabolism* 71, 213-225. 10.1016/j.metabol.2017.03.011.

**Supplementary Data 2. Metabolic profile and concomitant medications in the PL study.**

**(A. Diabetes, B. Hyperlipidemia)**

A. Glucose control and other glucose-lowering therapies during the PL study

| Subject ID | Baseline  |                                                                                                                               | 12 months        |                                                                                                                             |
|------------|-----------|-------------------------------------------------------------------------------------------------------------------------------|------------------|-----------------------------------------------------------------------------------------------------------------------------|
|            | HbA1c (%) | Diabetes treatment                                                                                                            | HbA1c (%)        | Diabetes treatment                                                                                                          |
| 1          | 9.6       | metformin 2000 mg/day<br>glipizide 10 mg/day<br>exenatide 10 mcg/day                                                          | 10.1             | metformin 2000 mg/day<br>glipizide 20 mg/day<br>exenatide 10 mcg/day                                                        |
| 2          | 6.6       | metformin 1000 mg/day                                                                                                         | 6.6              | metformin 1000 mg/day                                                                                                       |
| 3          | 8.5       | exenatide 20 mcg/day<br>regular (U500) insulin 225-450 units/day                                                              | 8.2              | regular (U500) insulin 500 units/day                                                                                        |
| 4          | 8.3       | none                                                                                                                          | N/A (withdrawal) | N/A (withdrawal)                                                                                                            |
| 5          | 10.2      | metformin 2000 mg/day<br>exenatide 2 mg/week<br>detemir insulin 120 units/day                                                 | 10.1             | metformin 2000 mg/day<br>detemir insulin 120 units/day                                                                      |
| 6          | 10.5      | pioglitazone 15 mg/day<br>regular (U500) insulin 750 units/day                                                                | 9.1              | NPH-regular insulin 100 units/day                                                                                           |
| 7          | 10.4      | regular (U500) insulin 725 units/day                                                                                          | 8.0              | regular (U500) insulin 600 units/day                                                                                        |
| 8          | 10.3      | regular (U500) insulin 422 units/day via pump                                                                                 | 8.2              | regular (U500) insulin 300 units/day via insulin pump                                                                       |
| 9          | 9.2       | metformin 2000 mg/day<br>exenatide 2 mg/week                                                                                  | 6.8              | metformin 2000 mg/day<br>exenatide 2 mg/week                                                                                |
| 10         | 7.3       | metformin 500 mg/day                                                                                                          | 7.8              | metformin 500 mg/day                                                                                                        |
| 11         | 10.1      | metformin 2000 mg/day<br>glipizide 5 mg/day<br>aspart protamine-aspart insulin 120 units/day<br>aspart insulin 6-30 units/day | 8.5              | metformin 2000 mg/day<br>glipizide 5 mg/day<br>aspart protamine-aspart insulin 200 units/day<br>aspart insulin 30 units/day |
| 12         | 9.2       | regular (U500) insulin 150-225 units/day                                                                                      | 10.7             | regular (U500) insulin 145 units/day                                                                                        |
| 13         | 10.3      | metformin 2000 mg/day<br>pioglitazone 30 mg/day<br>NPH insulin 84 units/day<br>regular insulin 28 units/day                   | 6.3              | metformin 2000 mg/day<br>NPH insulin 148 units/day<br>regular insulin 16 units/day                                          |

|    |      |                                                                                         |                   |                                                                  |
|----|------|-----------------------------------------------------------------------------------------|-------------------|------------------------------------------------------------------|
| 14 | 9.1  | metformin 1500 mg/day<br>glargine insulin 100 units/day<br>aspart insulin 150 units/day | N/A (withdrawal)  | N/A (withdrawal)                                                 |
| 15 | 5.8  | none                                                                                    | 5.9               | none                                                             |
| 16 | 12.4 | glargine insulin 55 units/day<br>aspart insulin 30 units/day                            | 13.2              | glargine 60 units/day                                            |
| 17 | 5.8  | none                                                                                    | 5.3               | none                                                             |
| 18 | 5.6  | metformin 500 mg/day                                                                    | N/A (screen fail) | N/A (screen fail)                                                |
| 19 | 6.4  | none                                                                                    | N/A (withdrawal)  | N/A (withdrawal)                                                 |
| 20 | 9.0  | none                                                                                    | 9.0               | none                                                             |
| 21 | 7.6  | metformin 1000 mg/day<br>aspart protamine/aspart insulin 60 unit/day                    | 7.7               | lispro protamine/lispro insulin 50 units/day                     |
| 22 | 6.2  | sitagliptin 100 mg/day                                                                  | 6.6               | sitagliptin 100 mg/day                                           |
| 23 | 8.4  | metformin 2000 mg/day<br>regular (U500) insulin 350-400 units/day                       | 8.1               | metformin 2000 mg/day<br>regular (U500) insulin 75-600 units/day |

B. Lipid parameters and other lipid lowering therapies during the PL study

| Subject ID | Lipids - Baseline |            |               |               | Lipid treatment - Baseline                                                                    | Lipids – 12 months |            |               |               | Lipid treatment – 12 months                                                               |
|------------|-------------------|------------|---------------|---------------|-----------------------------------------------------------------------------------------------|--------------------|------------|---------------|---------------|-------------------------------------------------------------------------------------------|
|            | TC (mg/dL)        | TG (mg/dL) | HDL-C (mg/dL) | LDL-C (mg/dL) |                                                                                               | TC (mg/dL)         | TG (mg/dL) | HDL-C (mg/dL) | LDL-C (mg/dL) |                                                                                           |
| 1          | 184               | 385        | 26            | 80            | none                                                                                          | 225                | 251        | 30            | 145           | none                                                                                      |
| 2          | 193               | 265        | 33            | 107           | krill oil 300 mg/day                                                                          | 193                | 268        | 34            | 105           | krill oil 300 mg/day                                                                      |
| 3          | 154               | 240        | 25            | 81            | fenofibrate 145 mg/day<br>pravastatin 40 mg/day                                               | 155                | 203        | 31            | 83            | fenofibrate 145 mg/day<br>pravastatin 40 mg/day                                           |
| 4          | 202               | 142        | 40            | 134           | none                                                                                          | N/A (withdrawal)   |            |               |               | N/A (withdrawal)                                                                          |
| 5          | 142               | 172        | 32            | 76            | atorvastatin 20 mg/day                                                                        | 141                | 162        | 33            | 76            | atorvastatin 20 mg/day                                                                    |
| 6          | 607               | 5194       | 24            | 28            | fenofibrate 154 mg/day<br>fish oil 1000 mg/day<br>simvastatin 40 mg/day<br>niaspan 500 mg/day | 157                | 475        | 30            | 68            | niaspan 500 mg/day                                                                        |
| 7          | 664               | 7004       | 29            | 18            | omega-3 acid ethyl esters 1000 mg daily                                                       | 169                | 457        | 28            | 96            | omega-3 2170 mg/day                                                                       |
| 8          | 271               | 748        | 34            | 123           | fenofibrate 45 mg/day<br>omega-3 acid ethyl esters 4000 mg/day<br>pitavastatin 3 mg/day       | 207                | 200        | 39            | 128           | fenofibrate 45 mg/day<br>pitavastatin 4 mg/day                                            |
| 9          | 334               | 1155       | 47            | 73            | atorvastatin 40 mg/week<br>fish oil 3600 mg/day                                               | 205                | 335        | 46            | 91            | atorvastatin 40 mg/week<br>fish oil 3600 mg/day                                           |
| 10         | 159               | 402        | 35            | 84            | fenofibrate 160 mg/day                                                                        | 145                | 309        | 32            | 91            | fenofibrate 160 mg/day                                                                    |
| 11         | 228               | 2716       | 20            | 13            | omega-3 acid ethyl esters 6000 mg/day<br>rosuvastatin 20 mg/day                               | 121                | 985        | 19            | 23            | omega-3 acid ethyl esters 6000 mg/day<br>rosuvastatin 20 mg/day                           |
| 12         | 148               | 177        | 44            | 69            | omega-3 acid ethyl esters 4000 mg/day<br>fenofibrate 145 mg/day<br>atorvastatin 80 mg/day     | 233                | 367        | 40            | 119           | omega-3 acid ethyl esters 4000 mg/day<br>fenofibrate 145 mg/day<br>atorvastatin 80 mg/day |
| 13         | 354               | 1780       | 37            | 77            | omega-3 acid ethyl esters 8000 mg/day                                                         | 128                | 111        | 43            | 63            | omega-3 acid ethyl esters 8000 mg/day                                                     |

|    |     |      |    |     |                                                              |                   |      |    |     |                                                 |
|----|-----|------|----|-----|--------------------------------------------------------------|-------------------|------|----|-----|-------------------------------------------------|
|    |     |      |    |     | fenofibrate 160 mg/day<br>pravastatin 20 mg/day              |                   |      |    |     | fenofibrate 160 mg/day<br>pravastatin 20 mg/day |
| 14 | 244 | 205  | 37 | 166 | fenofibrate 160 mg/day<br>omega-3 fatty acids<br>3600 mg/day | N/A (withdrawal)  |      |    |     | N/A (withdrawal)                                |
| 15 | 169 | 305  | 29 | 79  | None                                                         | 142               | 303  | 28 | 53  | None                                            |
| 16 | 202 | 308  | 38 | 103 | fish oil 500 mg/day<br>atorvastatin 40 mg/day                | 184               | 253  | 33 | 100 | fish oil 500 mg/day<br>atorvastatin 40 mg/day   |
| 17 | 223 | 211  | 36 | 145 | fish oil 1000 mg/day<br>rosuvastatin 20 mg/week              | 151               | 111  | 35 | 94  | fish oil 1000 mg/day<br>rosuvastatin 20 mg/week |
| 18 | 138 | 80   | 65 | 57  | fenofibrate 145 mg/day<br>rosuvastatin 20 mg/day             | N/A (screen fail) |      |    |     | N/A (screen fail)                               |
| 19 | 235 | 260  | 35 | 147 | none                                                         | N/A (withdrawal)  |      |    |     | N/A (withdrawal)                                |
| 20 | 341 | 1771 | 29 | 105 | fish oil 2000 mg/day                                         | 408               | 3646 | 28 | 97  | fish oil 7200 mg/day                            |
| 21 | 182 | 346  | 30 | 84  | gemfibrozil 1200 mg/day                                      | 183               | 204  | 29 | 113 | none                                            |
| 22 | 339 | 261  | 64 | 223 | none                                                         | 258               | 251  | 41 | 166 | none                                            |
| 23 | 196 | 195  | 35 | 122 | none                                                         | 188               | 200  | 36 | 112 | none                                            |

C: cholesterol, TC: total cholesterol, TG: triglyceride, HDL: high density lipoprotein, LDL: low density lipoprotein.

**Supplementary Data 3. Individual liver parameters in the PL study.**

| Subject ID | Baseline   |            |            |                    | 12 month   |            |            |                    |
|------------|------------|------------|------------|--------------------|------------|------------|------------|--------------------|
|            | AST (IU/L) | ALT (IU/L) | NASH score | Liver Fat %, Dixon | AST (IU/L) | ALT (IU/L) | NASH score | Liver Fat %, Dixon |
| 1          | 34         | 30         | 9          | 23                 | 24         | 27         | 7          | 12                 |
| 2          | 29         | 49         | 6          | 20                 | 20         | 28         | 4          | 8                  |
| 3          | 31         | 35         | 5          | 10                 | 32         | 33         | 6          | 8                  |
| 4          | 67         | 147        | 7          | 16                 | N/A        | N/A        | N/A        | N/A                |
| 5          | 16         | 19         | 4          | 5                  | 19         | 25         | 3          | 6                  |
| 6          | 128        | 97         | 6          | 13                 | 43         | 67         | 7          | 8                  |
| 7          | 52         | 51         | 7          | 14                 | 31         | 39         | 3          | 4                  |
| 8          | 82         | 53         | 8          | 11                 | 30         | 26         | 7          | 6                  |
| 9          | 47         | 100        | 7          | 24                 | 21         | 26         | 4          | 5                  |
| 10         | 31         | 40         | 6          | 17                 | 24         | 25         | 6          | 13                 |
| 11         | 31         | 67         | 6          | 14                 | 63         | 98         | 8          | 12                 |
| 12         | 51         | 54         | 6          | 12                 | 45         | 64         | 5          | 8                  |
| 13         | 23         | 27         | 5          | 22                 | 30         | 21         | 3          | 14                 |
| 14         | 41         | 37         | 4          | 4                  | N/A        | N/A        | N/A        | N/A                |
| 15         | 53         | 73         | 9          | 4                  | 31         | 31         | 7          | 3                  |
| 16         | 17         | 23         | 3          | 11                 | 18         | 21         | 1          | 4                  |
| 17         | 28         | 38         | 4          | 5                  | 16         | 13         | 2          | 2                  |
| 18         | 26         | 19         | 1          | 2                  | N/A        | N/A        | N/A        | N/A                |
| 19         | 22         | 24         | 6          | 11                 | N/A        | N/A        | NA         | N/A                |
| 20         | 23         | 35         | 7          | 21                 | 33         | 27         | 6          | 22                 |
| 21         | 18         | 20         | 6          | 3                  | 18         | 21         | 4          | 4                  |
| 22         | 18         | 21         | 5          | 5                  | 17         | 17         | N/A        | 3                  |
| 23         | 87         | 142        | 6          | 12                 | 62         | 75         | 7          | 13                 |

ALT: alanine aminotransferase, AST: aspartate aminotransferase, NASH score: nonalcoholic steatohepatitis score equals the sum of scores for steatosis, lobular inflammation, hepatocellular ballooning, and fibrosis, N/A: not available.



**Supplementary Data 4. Baseline characteristics of patients who qualified for the study protocol in the PL study.**

| <b>Parameter (n = 22)</b>            | <b>Mean ± SD</b> |
|--------------------------------------|------------------|
| Age (years)                          | 43 ± 16          |
| Gender (M:F)                         | 5:17             |
| Body weight (kg)                     | 77.9 ± 21.2      |
| Body mass index (kg/m <sup>2</sup> ) | 27.4 ± 5.8       |
| Waist-to-hip ratio                   | 0.99 ± 0.08      |
| FMR (%fat trunk/ %fat legs)          | 1.59 ± 0.53      |
| Systolic blood pressure (mmHg)       | 127 ± 16         |
| Diastolic blood pressure (mmHg)      | 75 ± 11          |
| Fasting leptin level (ng/ml)         | 22.7 ± 16.5      |
| Hemoglobin A1c (%)                   | 8.7 ± 1.7        |
| Glucose (mg/dL)                      | 183 ± 80         |
| Triglyceride (mg/dL)                 | 497 (298 - 831)  |
| AST (IU/L)                           | 42 ± 28          |
| ALT, IU/L                            | 54 ± 36          |
| REE (kcal)                           | 1880 ± 314       |
| RQ                                   | 0.76 ± 0.07      |
| *Total intake (grams)                | 2713 ± 1052      |
| Total energy intake (kcal)           | 1791 ± 452       |
| Total fat intake (grams)             | 76 ± 25          |
| Total carbohydrate intake (grams)    | 194 ± 53         |
| Total protein intake (grams)         | 91 ± 20          |

ALT: alanine aminotransferase, AST: aspartate aminotransferase, FMR: fat mass ratio, REE: resting energy expenditure, RQ: respiratory quotient. \*Total intake includes food, water and other beverages. Data are presented as mean ± standard deviation (SD). Triglycerides are reported as geometric mean and 95% confidence interval (CI).

**Supplementary Data 5. Adverse events in the PL study.**

| <b>Adverse event, n (%)</b>                                | <b>Patients (n=22)</b> | <b>Patients with possibly/probably related events (%)</b> |
|------------------------------------------------------------|------------------------|-----------------------------------------------------------|
| All adverse events                                         | 22 (100)               | 13 (59)                                                   |
| Mild                                                       | 17 (63.6)              | 11 (50)                                                   |
| Moderate                                                   | 18 (81.8)              | 9 (40.9)                                                  |
| Severe                                                     | 11 (50)                | 2 (9)                                                     |
| Serious adverse events                                     | 7 (31.2)               | 0                                                         |
| <b><u>Adverse event</u></b>                                |                        | <b><u>Patients (%)</u></b>                                |
| Upper respiratory tract infection                          |                        | 11 (50)                                                   |
| Hypoglycemia                                               |                        | 6 (27.2)                                                  |
| Diarrhea                                                   |                        | 5 (22.7)                                                  |
| Injection site reaction                                    |                        | 4 (18.1)                                                  |
| Urinary tract infection                                    |                        | 3 (13.6)                                                  |
| Dizziness                                                  |                        | 3 (13.6)                                                  |
| Rash not at injection site, 1 patient with skin granulomas |                        | 3 (13.6)                                                  |
| Asthma exacerbation                                        |                        | 3 (13.6)                                                  |
| Abdominal pain                                             |                        | 3 (13.6)                                                  |
| Nausea                                                     |                        | 3 (13.6)                                                  |

# Individual Liver Biopsies

| ID |                                                                                                                   | 40x                                                                                 | 100x                                                                                | 200x                                                                                 | DXA Fat Shadow<br>(Baseline)                                                          |
|----|-------------------------------------------------------------------------------------------------------------------|-------------------------------------------------------------------------------------|-------------------------------------------------------------------------------------|--------------------------------------------------------------------------------------|---------------------------------------------------------------------------------------|
| 01 | <b>Baseline</b>                                                                                                   | 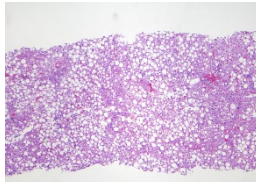   |    |    |    |
|    | Dixon Liver %Fat: 23%<br>NASH (H, S, L, F): 9 (2, 3, 2, 2)<br>NAS (H, S, L): 7 (2, 3, 2)<br>DXA Total %Fat: 33.6% |                                                                                     |                                                                                     |                                                                                      |                                                                                       |
| 01 | <b>Month 12</b>                                                                                                   |    |    |    |   |
|    | Dixon Liver %Fat: 12%<br>NASH (F, H, S, L): 7 (1, 3, 1, 2)<br>NAS (H, S, L): 5 (1, 3, 1)<br>DXA Total %Fat: 36.7% |                                                                                     |                                                                                     |                                                                                      |                                                                                       |
| 02 | <b>Baseline</b>                                                                                                   |    |    |    |   |
|    | Dixon Liver %Fat: 20%<br>NASH (H, S, L, F): 6 (1, 3, 1, 1)<br>NAS (H, S, L): 5 (1, 3, 1)<br>DXA Total %Fat: 34.2% |                                                                                     |                                                                                     |                                                                                      |                                                                                       |
| 02 | <b>Month 12</b>                                                                                                   |   |   |   |  |
|    | Dixon Liver %Fat: 8%<br>NASH (F, H, S, L): 4 (0, 2, 1, 1)<br>NAS (H, S, L): 3 (0, 2, 1)<br>DXA Total %Fat: 32.4%  |                                                                                     |                                                                                     |                                                                                      |                                                                                       |
| 03 | <b>Baseline</b>                                                                                                   |  |  |  |  |
|    | Dixon Liver %Fat: 10%<br>NASH (H, S, L, F): 5 (1, 2, 1, 1)<br>NAS (H, S, L): 4 (1, 2, 1)<br>DXA Total %Fat: 37.9% |                                                                                     |                                                                                     |                                                                                      |                                                                                       |
| 03 | <b>Month 12</b>                                                                                                   |  |  |  |  |
|    | Dixon Liver %Fat: 8%<br>NASH (F, H, S, L): 6 (1, 2, 1, 2)<br>NAS (H, S, L): 4 (1, 2, 1)<br>DXA Total %Fat: 41.8%  |                                                                                     |                                                                                     |                                                                                      |                                                                                       |
| 04 | <b>Baseline</b>                                                                                                   |  |  |  |  |
|    | Dixon Liver %Fat: 16%<br>NASH (H, S, L, F): 7 (1, 3, 2, 1)<br>NAS (H, S, L): 6 (1, 3, 2)<br>DXA Total %Fat: 14.5% |                                                                                     |                                                                                     |                                                                                      |                                                                                       |
| 04 | <b>Month 12</b>                                                                                                   | Dropped out                                                                         |                                                                                     |                                                                                      |                                                                                       |



| ID |                 | 40x                                                                                                               | 100x | 200x | DXA Fat Shadow<br>(Baseline) |  |
|----|-----------------|-------------------------------------------------------------------------------------------------------------------|------|------|------------------------------|--|
| 05 | <b>Baseline</b> | Dixon Liver %Fat: 5%<br>NASH (H, S, L, F): 4 (1, 1, 2, 0)<br>NAS (H, S, L): 4 (1, 1, 2)<br>DXA Total %Fat: 37.6%  |      |      |                              |  |
|    | <b>Month 12</b> | Dixon Liver %Fat: 6%<br>NASH (F, H, S, L): 3 (1, 1, 1, 0)<br>NAS (H, S, L): 3 (1, 1, 1)<br>DXA Total %Fat: 36.6%  |      |      |                              |  |
| 06 | <b>Baseline</b> | Dixon Liver %Fat: 13%<br>NASH (H, S, L, F): 6 (2, 2, 1, 1)<br>NAS (H, S, L): 5 (2, 2, 1)<br>DXA Total %Fat: 12.7% |      |      |                              |  |
|    | <b>Month 12</b> | Dixon Liver %Fat: 8%<br>NASH (F, H, S, L): 7 (2, 2, 1, 2)<br>NAS (H, S, L): 5 (2, 2, 1)<br>DXA Total %Fat: 17.5%  |      |      |                              |  |
| 07 | <b>Baseline</b> | Dixon Liver %Fat: 14%<br>NASH (H, S, L, F): 7 (2, 3, 1, 1)<br>NAS (H, S, L): 6 (2, 3, 1)<br>DXA Total %Fat: 19.9% |      |      |                              |  |
|    | <b>Month 12</b> | Dixon Liver %Fat: 4%<br>NASH (F, H, S, L): 3 (1, 1, 1, 0)<br>NAS (H, S, L): 3 (1, 1, 1)<br>DXA Total %Fat: 21.0%  |      |      |                              |  |
| 08 | <b>Baseline</b> | Dixon Liver %Fat: 11%<br>NASH (H, S, L, F): 8 (2, 3, 1, 2)<br>NAS (H, S, L): 6 (2, 3, 1)<br>DXA Total %Fat: 34.7% |      |      |                              |  |
|    | <b>Month 12</b> | Dixon Liver %Fat: 6%<br>NASH (F, H, S, L): 7 (2, 2, 1, 2)<br>NAS (H, S, L): 5 (2, 2, 1)<br>DXA Total %Fat: 37.5%  |      |      |                              |  |
| 09 | <b>Baseline</b> | Dixon Liver %Fat: 24%<br>NASH (H, S, L, F): 7 (2, 3, 1, 1)<br>NAS (H, S, L): 6 (2, 3, 1)<br>DXA Total %Fat: 36.9% |      |      |                              |  |
|    | <b>Month 12</b> | Dixon Liver %Fat: 5%<br>NASH (F, H, S, L): 4 (1, 1, 1, 1)<br>NAS (H, S, L): 3 (1, 1, 1)<br>DXA Total %Fat: 33.4%  |      |      |                              |  |



| ID |                                   | 40x                                                                                 | 100x                                                                                 | 200x                                                                                  | DXA Fat Shadow<br>(Baseline)                                                          |
|----|-----------------------------------|-------------------------------------------------------------------------------------|--------------------------------------------------------------------------------------|---------------------------------------------------------------------------------------|---------------------------------------------------------------------------------------|
| 10 | <b>Baseline</b>                   | Dixon Liver %Fat: 17%                                                               |                                                                                      |                                                                                       | 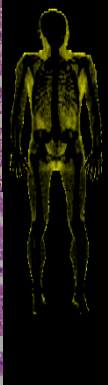   |
|    | NASH (H, S, L, F): 6 (1, 3, 1, 1) |    |    |    |                                                                                       |
|    | NAS (H, S, L): 5 (1, 3, 1)        |                                                                                     |                                                                                      |                                                                                       |                                                                                       |
|    | DXA Total %Fat: 24.7%             |                                                                                     |                                                                                      |                                                                                       |                                                                                       |
| 10 | <b>Month 12</b>                   | Dixon Liver %Fat: 13%                                                               |                                                                                      |                                                                                       |    |
|    | NASH (F, H, S, L): 6 (1, 2, 1, 2) |    |    |    |                                                                                       |
|    | NAS (H, S, L): 4 (1, 2, 1)        |                                                                                     |                                                                                      |                                                                                       |                                                                                       |
|    | DXA Total %Fat: 22.9%             |                                                                                     |                                                                                      |                                                                                       |                                                                                       |
| 11 | <b>Baseline</b>                   | Dixon Liver %Fat: 14%                                                               |                                                                                      |                                                                                       |    |
|    | NASH (H, S, L, F): 6 (1, 2, 1, 2) |    |    |    |                                                                                       |
|    | NAS (H, S, L): 4 (1, 2, 1)        |                                                                                     |                                                                                      |                                                                                       |                                                                                       |
|    | DXA Total %Fat: 40.7%             |                                                                                     |                                                                                      |                                                                                       |                                                                                       |
| 11 | <b>Month 12</b>                   | Dixon Liver %Fat: 12%                                                               |                                                                                      |                                                                                       |    |
|    | NASH (F, H, S, L): 8 (1, 3, 1, 3) |    |    |    |                                                                                       |
|    | NAS (H, S, L): 5 (1, 3, 1)        |                                                                                     |                                                                                      |                                                                                       |                                                                                       |
|    | DXA Total %Fat: 41.0%             |                                                                                     |                                                                                      |                                                                                       |                                                                                       |
| 12 | <b>Baseline</b>                   | Dixon Liver %Fat: 12%                                                               |                                                                                      |                                                                                       |   |
|    | NASH (H, S, L, F): 6 (1, 2, 1, 2) |   |   |   |                                                                                       |
|    | NAS (H, S, L): 4 (1, 2, 1)        |                                                                                     |                                                                                      |                                                                                       |                                                                                       |
|    | DXA Total %Fat: 42.4%             |                                                                                     |                                                                                      |                                                                                       |                                                                                       |
| 12 | <b>Month 12</b>                   | Dixon Liver %Fat: 8%                                                                |                                                                                      |                                                                                       |   |
|    | NASH (F, H, S, L): 5 (1, 2, 1, 1) |  |  |  |                                                                                       |
|    | NAS (H, S, L): 4 (1, 2, 1)        |                                                                                     |                                                                                      |                                                                                       |                                                                                       |
|    | DXA Total %Fat: 42.2%             |                                                                                     |                                                                                      |                                                                                       |                                                                                       |
| 13 | <b>Baseline</b>                   | Dixon Liver %Fat: 22%                                                               |                                                                                      |                                                                                       |  |
|    | NASH (H, S, L, F): 5 (1, 3, 1, 0) |  |  |  |                                                                                       |
|    | NAS (H, S, L): 5 (1, 3, 1)        |                                                                                     |                                                                                      |                                                                                       |                                                                                       |
|    | DXA Total %Fat: 22.9%             |                                                                                     |                                                                                      |                                                                                       |                                                                                       |
| 13 | <b>Month 12</b>                   | Dixon Liver %Fat: 14%                                                               |                                                                                      |                                                                                       |  |
|    | NASH (F, H, S, L): 3 (0, 2, 1, 0) |  |  |  |                                                                                       |
|    | NAS (H, S, L): 3 (0, 2, 1)        |                                                                                     |                                                                                      |                                                                                       |                                                                                       |
|    | DXA Total %Fat: 21.5%             |                                                                                     |                                                                                      |                                                                                       |                                                                                       |
| 14 | <b>Baseline</b>                   | Dixon Liver %Fat: 4%                                                                |                                                                                      |                                                                                       |  |
|    | NASH (H, S, L, F): 4 (0, 2, 1, 1) |  |  |  |                                                                                       |
|    | NAS (H, S, L): 3 (0, 2, 1)        |                                                                                     |                                                                                      |                                                                                       |                                                                                       |
|    | DXA Total %Fat: 36.2%             |                                                                                     |                                                                                      |                                                                                       |                                                                                       |
| 14 | <b>Month 12</b>                   | Dropped out                                                                         |                                                                                      |                                                                                       |  |
|    |                                   |                                                                                     |                                                                                      |                                                                                       |                                                                                       |



| ID |                 | 40x                                                                                                               | 100x | 200x | DXA Fat Shadow (Baseline) |  |
|----|-----------------|-------------------------------------------------------------------------------------------------------------------|------|------|---------------------------|--|
| 15 | <b>Baseline</b> | Dixon Liver %Fat: 4%<br>NASH (H, S, L, F): 9 (2, 2, 1, 4)<br>NAS (H, S, L): 5 (2, 2, 1)<br>DXA Total %Fat: 21.0%  |      |      |                           |  |
|    | <b>Month 12</b> | Dixon Liver %Fat: 3%<br>NASH (F, H, S, L): 7 (2, 1, 1, 3)<br>NAS (H, S, L): 4 (2, 1, 1)<br>DXA Total %Fat: 19.9%  |      |      |                           |  |
| 16 | <b>Baseline</b> | Dixon Liver %Fat: 11%<br>NASH (H, S, L, F): 3 (1, 1, 1, 0)<br>NAS (H, S, L): 3 (1, 1, 1)<br>DXA Total %Fat: 44.5% |      |      |                           |  |
|    | <b>Month 12</b> | Dixon Liver %Fat: 4%<br>NASH (F, H, S, L): 1 (0, 1, 0, 0)<br>NAS (H, S, L): 1 (0, 1, 0)<br>DXA Total %Fat: 44.0%  |      |      |                           |  |
| 17 | <b>Baseline</b> | Dixon Liver %Fat: 5%<br>NASH (H, S, L, F): 4 (1, 2, 1, 0)<br>NAS (H, S, L): 4 (1, 2, 1)<br>DXA Total %Fat: 21.4%  |      |      |                           |  |
|    | <b>Month 12</b> | Dixon Liver %Fat: 2%<br>NASH (H, S, L, F): 2 (0, 1, 1, 0)<br>NAS (H, S, L): 2 (0, 1, 1)<br>DXA Total %Fat: 19.3%  |      |      |                           |  |
| 18 | <b>Baseline</b> | Dixon Liver %Fat: 2%<br>NASH (H, S, L, F): 1 (0, 0, 1, 0)<br>NAS (H, S, L): 1 (0, 0, 1)<br>DXA Total %Fat: 27.5%  |      |      |                           |  |
|    | <b>Month 12</b> | No NASH on baseline (excluded)                                                                                    |      |      |                           |  |
| 19 | <b>Baseline</b> | Dixon Liver %Fat: 11%<br>NASH (H, S, L, F): 6 (1, 2, 2, 1)<br>NAS (H, S, L): 5 (1, 2, 2)<br>DXA Total %Fat: 47.0% |      |      |                           |  |
|    | <b>Month 12</b> | Dropped out                                                                                                       |      |      |                           |  |



| ID                                           |                                                                                     | 40x                                                                                  | 100x                                                                                  | 200x                                                                                  | DXA Fat Shadow<br>(Baseline)                                                          |
|----------------------------------------------|-------------------------------------------------------------------------------------|--------------------------------------------------------------------------------------|---------------------------------------------------------------------------------------|---------------------------------------------------------------------------------------|---------------------------------------------------------------------------------------|
| 20                                           | <b>Baseline</b>                                                                     | Dixon Liver %Fat: 21%                                                                |                                                                                       |                                                                                       | 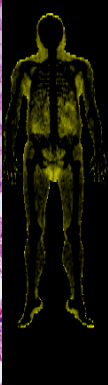    |
|                                              | NASH (H, S, L, F): 7 (1, 3, 2, 1)                                                   |      |      |     |                                                                                       |
| NAS (H, S, L): 6 (1, 3, 2)                   |    |    |    |                                                                                       |                                                                                       |
| DXA Total %Fat: 23.5%                        |                                                                                     |                                                                                      |                                                                                       |                                                                                       |                                                                                       |
| <b>Month 12</b>                              | Dixon Liver %Fat: 22%                                                               |                                                                                      |                                                                                       |                                                                                       |                                                                                       |
| NASH (F, H, S, L): 6 (1, 3, 1, 1)            |                                                                                     |                                                                                      |                                                                                       |                                                                                       |                                                                                       |
| NAS (H, S, L): 5 (1, 3, 1)                   |                                                                                     |                                                                                      |                                                                                       |                                                                                       |                                                                                       |
| DXA Total %Fat: 22.2%                        |                                                                                     |                                                                                      |                                                                                       |                                                                                       |                                                                                       |
| 21                                           | <b>Baseline</b>                                                                     | Dixon Liver %Fat: 3%                                                                 |                                                                                       |                                                                                       |    |
|                                              | NASH (H, S, L, F): 6 (2, 1, 1, 2)                                                   |     |     |    |                                                                                       |
| NAS (H, S, L): 4 (2, 1, 1)                   |    |    |    |                                                                                       |                                                                                       |
| DXA Total %Fat: 25.3%                        |                                                                                     |                                                                                      |                                                                                       |                                                                                       |                                                                                       |
| <b>Month 12</b>                              | Dixon Liver %Fat: 4%                                                                |                                                                                      |                                                                                       |                                                                                       |                                                                                       |
| NASH (F, H, S, L): 4 (0, 1, 1, 2)            |                                                                                     |                                                                                      |                                                                                       |                                                                                       |                                                                                       |
| NAS (H, S, L): 2 (0, 1, 1)                   |                                                                                     |                                                                                      |                                                                                       |                                                                                       |                                                                                       |
| DXA Total %Fat: 27.3%                        |                                                                                     |                                                                                      |                                                                                       |                                                                                       |                                                                                       |
| 22                                           | <b>Baseline</b>                                                                     | Dixon Liver %Fat: 5%                                                                 |                                                                                       |                                                                                       |   |
|                                              | NASH (H, S, L, F): 5 (1, 1, 1, 2)                                                   |    |    |   |                                                                                       |
| NAS (H, S, L): 3 (1, 1, 1)                   |  |  |  |                                                                                       |                                                                                       |
| DXA Total %Fat: 33.1%                        |                                                                                     |                                                                                      |                                                                                       |                                                                                       |                                                                                       |
| <b>Month 12</b>                              | Dixon Liver %Fat: 3%                                                                |                                                                                      |                                                                                       |                                                                                       |                                                                                       |
| NASH (F, H, S, L): No 2 <sup>nd</sup> biopsy |                                                                                     |                                                                                      |                                                                                       |                                                                                       |                                                                                       |
| NAS (H, S, L): No 2 <sup>nd</sup> biopsy     |                                                                                     |                                                                                      |                                                                                       |                                                                                       |                                                                                       |
| DXA Total %Fat: 31.1%                        |                                                                                     |                                                                                      |                                                                                       |                                                                                       |                                                                                       |
| 23                                           | <b>Baseline</b>                                                                     | Dixon Liver %Fat: 12%                                                                |                                                                                       |                                                                                       |  |
|                                              | NASH (H, S, L, F): 6 (1, 2, 2, 1)                                                   |   |   |  |                                                                                       |
| NAS (H, S, L): 5 (1, 2, 2)                   |  |  |  |                                                                                       |                                                                                       |
| DXA Total %Fat: 37.5%                        |                                                                                     |                                                                                      |                                                                                       |                                                                                       |                                                                                       |
| <b>Month 12</b>                              | Dixon Liver %Fat: 13%                                                               |                                                                                      |                                                                                       |                                                                                       |                                                                                       |
| NASH (F, H, S, L): 7 (1, 3, 1, 2)            |                                                                                     |                                                                                      |                                                                                       |                                                                                       |                                                                                       |
| NAS (H, S, L): 5 (1, 3, 1)                   |                                                                                     |                                                                                      |                                                                                       |                                                                                       |                                                                                       |
| DXA Total %Fat: 38.6%                        |                                                                                     |                                                                                      |                                                                                       |                                                                                       |                                                                                       |

**Supplementary data 6. Individual liver biopsies in subjects with PL with NAS and NASH scores.**

40x, 100x, and 200x photographs from H&E stained slides presented at baseline and 12 month biopsies. NAS: non-alcoholic fatty liver disease activity score, the sum of scores for steatosis (S), lobular inflammation (L), and hepatocellular ballooning (H), NASH score: nonalcoholic steatohepatitis score equals the sum of scores for steatosis (S), lobular inflammation (L), hepatocellular ballooning (H), and fibrosis (F). Liver fat, quantified by magnetic resonance Dixon method, is shown at baseline and month 12. Also shown are fat shadows derived from DXA scans to create a permanent record of fat distribution. Total fat percentages calculated from DXA scans are also presented.
